# Supplementary material for: Mindfulness-based stress reduction may decrease stress, disease activity, and inflammatory cytokine levels in patients with autoimmune hepatitis
Source: PubMed Central journal article supplement — JHEP Rep. 2022 Feb 18;4(5):100450. doi: 10.1016/j.jhepr.2022.100450 (PMC9011026; doi:10.1016/j.jhepr.2022.100450), 2022-02-18
Supplement: mmc1.pdf [file mmc1.pdf]

**Mindfulness-based stress reduction may decrease stress, disease activity, and inflammatory cytokine levels in patients with autoimmune hepatitis**

Leina S. Alrabadi, Anne Dutton, Anahita Rabiee, Scott J. Roberts, Yanhong Deng, Laura Cusack, Marina G. Silveira, Maria Ciarleglio, Richard Bucala, Rajita Sinha, James L. Boyer, David N. Assis

Table of contents

|               |   |
|---------------|---|
| Table S1..... | 2 |
| Table S2..... | 3 |
| Table S3..... | 4 |
| Table S4..... | 7 |

**Table S1.** Perceived Stress Scale (PSS).

The questions in this scale ask you about your feelings and thoughts **during the last month**. In each case, you will be asked to indicate by circling *how often* you felt or thought a certain way.

|                                                                                                                            | 0 = Never | 1 = Almost Never | 2 = Sometimes | 3 = Fairly Often | 4 = Very Often |
|----------------------------------------------------------------------------------------------------------------------------|-----------|------------------|---------------|------------------|----------------|
| 1. In the last month, how often have you been upset because of something that happened unexpectedly? .....                 | 0         | 1                | 2             | 3                | 4              |
| 2. In the last month, how often have you felt that you were unable to control the important things in your life? .....     | 0         | 1                | 2             | 3                | 4              |
| 3. In the last month, how often have you felt nervous and "stressed"? .....                                                | 0         | 1                | 2             | 3                | 4              |
| 4. In the last month, how often have you felt confident about your ability to handle your personal problems? .....         | 0         | 1                | 2             | 3                | 4              |
| 5. In the last month, how often have you felt that things were going your way?.....                                        | 0         | 1                | 2             | 3                | 4              |
| 6. In the last month, how often have you found that you could not cope with all the things that you had to do? .....       | 0         | 1                | 2             | 3                | 4              |
| 7. In the last month, how often have you been able to control irritations in your life? .....                              | 0         | 1                | 2             | 3                | 4              |
| 8. In the last month, how often have you felt that you were on top of things?..                                            | 0         | 1                | 2             | 3                | 4              |
| 9. In the last month, how often have you been angered because of things that were outside of your control?.....            | 0         | 1                | 2             | 3                | 4              |
| 10. In the last month, how often have you felt difficulties were piling up so high that you could not overcome them? ..... | 0         | 1                | 2             | 3                | 4              |

**Table S2. The Brief Self-Scoring Self-Control Scale (BSCS).  
10-Item Self-Scoring Self-Control Scale**

Adapted from  
Tangney, J.P., Baumeister, R.F., Boone, A.L. (2004). High Self-Control Predicts Good Adjustment, Less Pathology, Better Grades, and Interpersonal Success. *Journal of Personality*, 271-324.

First, please read the following 10 statements and for each, check the box that best represents you.

|                                                                                 | Not at all like me | A little like me | Some what like me | Mostly Like Me | Very much like me |
|---------------------------------------------------------------------------------|--------------------|------------------|-------------------|----------------|-------------------|
| I have a hard time breaking bad habits.                                         | 5                  | 4                | 3                 | 2              | 1                 |
| I get distracted easily.                                                        | 5                  | 4                | 3                 | 2              | 1                 |
| I say inappropriate things.                                                     | 5                  | 4                | 3                 | 2              | 1                 |
| I refuse things that are bad for me, even if they are fun.                      | 1                  | 2                | 3                 | 4              | 5                 |
| I'm good at resisting temptation.                                               | 1                  | 2                | 3                 | 4              | 5                 |
| People would say that I have very strong self-discipline.                       | 1                  | 2                | 3                 | 4              | 5                 |
| Pleasure and fun sometimes keep me from getting work done.                      | 5                  | 4                | 3                 | 2              | 1                 |
| I do things that feel good in the moment but regret later on.                   | 5                  | 4                | 3                 | 2              | 1                 |
| Sometimes I can't stop myself from doing something, even if I know it is wrong. | 5                  | 4                | 3                 | 2              | 1                 |
| I often act without thinking through all the alternatives.                      | 5                  | 4                | 3                 | 2              | 1                 |

Next, add up all the points for the checked boxes and divide by 10. The maximum score on this scale is 5 (extremely self-controlled), and the lowest score on this scale is 1 (not at all self-controlled).

**Table S3.** Individual data on disease duration, disease activity, and immunosuppressive medications for each study participant.

| Study Participant # | Disease duration before enrollment (years) | # of relapses in prior 2 years | Active Disease at Enrollment | Comments                                 | 6-months pre-Baseline             | Baseline                          | 8-weeks                           | 8-months                          | 1-year                           |
|---------------------|--------------------------------------------|--------------------------------|------------------------------|------------------------------------------|-----------------------------------|-----------------------------------|-----------------------------------|-----------------------------------|----------------------------------|
| 1                   | 2                                          | 0                              | N                            |                                          | AZA 75 mg/day<br>Pred 7.5 mg/day  | AZA 75 mg/day<br>Pred 5 mg/day    | AZA 75 mg/day<br>Pred 2.5 mg/day  | AZA 75 mg/day<br>-                | AZA 50 mg/day<br>-               |
| 2                   | 4                                          | 0                              | N                            |                                          | AZA 100 mg/day<br>Pred 3.5 mg/day | AZA 100 mg/day<br>Pred 3.5 mg/day | AZA 100 mg/day<br>Pred 2.5 mg/day | AZA 75 mg/day<br>Pred 2.5 mg/day  | AZA 75 mg/day<br>Pred 2.5 mg/day |
| 3                   | 21                                         | 0                              | N                            |                                          | -                                 | -                                 | -                                 | -                                 | -                                |
| 4                   | 3                                          | 0                              | N                            |                                          | AZA 50 mg/day<br>Pred 7.5 mg/day  | AZA 50 mg/day<br>Pred 7.5 mg/day  | AZA 50 mg/day<br>Pred 6.5 mg/day  | AZA 100 mg/day<br>Pred 5 mg/day   | AZA 100 mg/day<br>Pred 5 mg/day  |
| 5                   | 19                                         | 0                              | Y                            | Incomplete response to ongoing treatment | AZA 150 mg/day<br>Pred 7.5 mg/day | AZA 150 mg/day<br>Pred 15 mg/day  | -<br>Pred 5 mg/day                | AZA 150 mg/day<br>Pred 2.5 mg/day | -<br>-                           |
| 6                   | 2                                          | 0                              | N                            |                                          | AZA 100 mg/day<br>Budes 6 mg/day  | AZA 100 mg/day<br>Budes 6 mg/day  | AZA 100 mg/day                    | AZA 100 mg/day<br>Budes 3 mg/day  | AZA 100 mg/day                   |

|    |    |   |   |                                 |                                            |                                             |                                                     |                                                |                                                |
|----|----|---|---|---------------------------------|--------------------------------------------|---------------------------------------------|-----------------------------------------------------|------------------------------------------------|------------------------------------------------|
|    |    |   |   |                                 |                                            |                                             | Budes<br>6<br>mg/day                                |                                                | Budes 3<br>mg/day                              |
| 7  | 1  | 0 | Y | New<br>treatment<br>regimen     | -<br>-                                     | AZA 50<br>mg/day<br>Budes 9<br>mg/day       | AZA 50<br>mg/day<br>Budes<br>9<br>mg/day            | AZA 75<br>mg/day<br>Budes 9<br>mg/day          | -<br>Budes 3<br>mg/day                         |
| 8  | 38 | 0 | N |                                 | AZA 75<br>mg/day<br>Pred 5<br>mg/day       | AZA 50<br>mg/day<br>Pred 5<br>mg/day        | AZA 50<br>mg/day<br>Pred 5<br>mg/day                | AZA 50<br>mg/day<br>Pred 4<br>mg/day           | AZA 50<br>mg/day<br>Pred<br>2.5<br>mg/day      |
| 9  | 1  | 0 | N |                                 | AZA 50<br>mg/day<br>-<br>Pred 20<br>mg/day | AZA 100<br>mg/day<br>-<br>Pred 10<br>mg/day | AZA<br>125<br>mg/day<br>-<br>Pred<br>12.5<br>mg/day | -<br>TAC 1<br>mg BID<br>Pred<br>17.5<br>mg/day | -<br>TAC 1<br>mg BID<br>Pred<br>17.5<br>mg/day |
| 10 | 1  | 0 | Y | Initial<br>treatment<br>regimen | -<br>-<br>-                                | -<br>AZA 50<br>mg/day<br>Budes 6<br>mg/day  | -<br>AZA<br>100<br>mg/day<br>Budes<br>9<br>mg/day   | -<br>-<br>Budes 9<br>mg/day                    | MMF<br>500 mg<br>BID<br>-<br>Budes 6<br>mg/day |
| 11 | 14 | 3 | N |                                 | Pred 12.5<br>mg/day                        | Pred 15<br>mg/day                           | Pred<br>12.5<br>mg/day                              | Pred 10<br>mg/day                              | Pred 10<br>mg/day                              |
| 12 | 8  | 0 | N |                                 | MMF<br>1000 mg<br>BID                      | MMF 500<br>mg BID                           | -<br>TAC 4<br>mg BID                                | -<br>TAC 7<br>mg BID                           | -<br>TAC 7<br>mg BID                           |

|    |     |   |   |                          |                                              |                                          |                                           |                                           |                                           |
|----|-----|---|---|--------------------------|----------------------------------------------|------------------------------------------|-------------------------------------------|-------------------------------------------|-------------------------------------------|
|    |     |   |   |                          | TAC 3 mg<br>BID<br>Pred 20<br>mg/day         | TAC 3<br>mg BID<br>Pred 10<br>mg/day     | Pred 5<br>mg/day                          | Pred 2.5<br>mg/day                        | Pred 5<br>mg/day                          |
| 13 | 7   | 1 | N |                          | AZA 150<br>mg/day                            | AZA 150<br>mg/day                        | AZA<br>150<br>mg/day                      | AZA 150<br>mg/day                         | AZA<br>150<br>mg/day                      |
| 14 | 2   | 1 | Y | Treatment<br>for relapse | AZA 50<br>mg/day<br>-<br>Pred 12.5<br>mg/day | -<br>-<br>Pred 10<br>mg/day              | -<br>-<br>Pred<br>7.5<br>mg/day           | -<br>-<br>Pred 7.5<br>mg/day              | -<br>-<br>Budes 9<br>mg/day<br>-          |
| 15 | 3   | 1 | N |                          | MMF<br>1000 mg<br>BID<br>Pred 2<br>mg/day    | MMF 500<br>mg BID<br>Pred 2<br>mg/day    | MMF<br>500 mg<br>BID<br>Pred 2<br>mg/day  | MMF<br>1000 mg<br>BID<br>Pred 2<br>mg/day | MMF<br>1000<br>mg BID<br>Pred 2<br>mg/day |
| 16 | 0.8 | 1 | Y | Treatment<br>for relapse | AZA 50<br>mg/day<br>Pred 30<br>mg/day        | AZA 100<br>mg/day<br>Pred 17.5<br>mg/day | AZA<br>150<br>mg/day<br>Pred 15<br>mg/day | AZA 150<br>mg/day<br>Pred 7.5<br>mg/day   | AZA<br>150<br>mg/day<br>Pred 5<br>mg/day  |
| 17 | 0.4 | 1 | Y | Treatment<br>for relapse | -<br>-                                       | -<br>Pred 15<br>mg/day                   | AZA<br>100<br>mg/day<br>Pred 10<br>mg/day | AZA 100<br>mg/day<br>Pred 40<br>mg/day    | AZA<br>100<br>mg/day<br>Pred 10<br>mg/day |

Abbreviations:

- AZA (azathioprine); Pred (prednisone); Budes (budesonide); MMF (mycophenolate mofetil); TAC (tacrolimus); mg (milligrams); BID (twice-daily).

**Table S4.** Journal of Hepatology CTAT methods.

Tables for a “Complete, Transparent, Accurate and Timely account” (CTAT) are now mandatory for all revised submissions. The aim is to enhance the reproducibility of methods.

- Only include the parts relevant to your study
- Refer to the CTAT in the main text as ‘Supplementary CTAT Table’
- Do not add subheadings
- Add as many rows as needed to include all information
- Only include one item per row

**If the CTAT form is not relevant to your study, please outline the reasons why:**

|  |
|--|
|  |
|--|

**1.1 Antibodies/ELISA KITS**

| <b>Name</b>                                                          | <b>Citation</b>                                                                                  | <b>Supplier</b>                               | <b>Cat no.</b>               | <b>Clone no.</b> |
|----------------------------------------------------------------------|--------------------------------------------------------------------------------------------------|-----------------------------------------------|------------------------------|------------------|
| ELISA KIT for Macrophage Migration Inhibitory Factor (MIF)           | www.rndsystems.com                                                                               | Biotechnie-R&D systems Human MIF DuoSet ELISA | CAT # DY289 Lot P136289      | N/A              |
| Multi-Cytokine ELISA (LEGENDplex) Human Inflammation Panel (13 Plex) | www.Biolegend.com                                                                                | Biolegend                                     | CAT #740118, Lot No. B250150 | N/A              |
| Antibodies for Soluble CD74 (sCD74) ELISA                            | <a href="http://www.SCBT.com">www.SCBT.com</a> and Assis et al. (Hepatology 2014; PMID 23913513) | Santa Cruz Biotechnology                      | LN-2 C-16                    | sc-6262 sc-5438  |

## 1.2 Cell lines

| Name | Citation | Supplier | Cat no. | Passage no. | Authentication test method |
|------|----------|----------|---------|-------------|----------------------------|
| N/A  |          |          |         |             |                            |

## 1.3 Organisms

| Name | Citation | Supplier | Strain | Sex | Age | Overall n number |
|------|----------|----------|--------|-----|-----|------------------|
| N/A  |          |          |        |     |     |                  |

## 1.4 Sequence based reagents

| Name | Sequence | Supplier |
|------|----------|----------|
| N/A  |          |          |

## 1.5 Biological samples

| Description | Source | Identifier |
|-------------|--------|------------|
| N/A         |        |            |

## 1.6 Deposited data

| Name of repository | Identifier | Link |
|--------------------|------------|------|
| N/A                |            |      |

## 1.7 Software

| Software name | Manufacturer | Version |
|---------------|--------------|---------|
| Prism         | GraphPad     | 7       |

## 1.8 Other (e.g. drugs, proteins, vectors etc.)



|     |  |  |
|-----|--|--|
| N/A |  |  |
|     |  |  |

**1.9 Please provide the details of the corresponding methods author for the manuscript:**

Scott Roberts, PhD and David N. Assis, MD  
Department of Medicine, Section of Digestive Diseases  
300 Cedar Street, The Anlyan Center, Suite S230  
Yale School of Medicine  
New Haven, CT 06510  
Tel: 203.785.5279. Fax: 203.785.7273.  
E-mail: [Scott.Roberts@yale.edu](mailto:Scott.Roberts@yale.edu) and [David.assis@yale.edu](mailto:David.assis@yale.edu)

**2.0 Please confirm for randomised controlled trials all versions of the clinical protocol are included in the submission. These will be published online as supplementary information.**

N/A
